# Supplementary material for: Free mate choice enhances conservation breeding in the endangered giant panda
Source: PubMed Central journal article supplement (PMC4682106; doi:10.1038/ncomms10125), 2015-12-15
Supplement: ncomms10125-s1.pdf [file ncomms10125-s1.pdf]

**Supplementary Table 1. Summary of a generalized linear mixed model analysis of intromission<sup>a</sup> for female giant panda's preferred and nonpreferred mates.**

| Explanatory variables    | B <sup>b</sup> | s.e. <sup>b</sup> | Wald Chi-Square <sup>b</sup> | d.f. <sup>b</sup> | p <sup>b</sup> |
|--------------------------|----------------|-------------------|------------------------------|-------------------|----------------|
| Fixed effects            |                |                   |                              |                   |                |
| Intercept                | 2.61           | 0.34              | 45.51                        | 1                 | <0.001*        |
| Preference               | 2.63           | 0.02              | 155.21                       | 1                 | <0.001*        |
| Neighbor Status (days)   | -1.49          | 0.89              | -0.17                        | 1                 | 0.866          |
| Pair had cubs previously | 0.65           | 0.23              | 0.03                         | 1                 | <0.001*        |
| Provenance               | 1.76           | 1.53              | 1.14                         | 1                 | 0.253          |
| Rearing                  | 1.22           | 1.59              | 0.77                         | 1                 | 0.441          |
| Female age (years)       | 0.16           | 0.20              | 0.83                         | 1                 | 0.408          |
| Female mass (kg)         | -0.05          | 0.07              | -0.68                        | 1                 | 0.500          |
| Male age (years)         | 0.69           | 0.43              | 1.60                         | 1                 | 0.109          |
| Male mass (kg)           | 0.08           | 0.03              | 3.02                         | 1                 | 0.003*         |
| BIC                      |                |                   |                              |                   | 175.26         |

a. As a function of preference, neighbor status, if the pair had successfully had cubs previously, provenance, rearing, female mass and age, male mass and age, (N=41, Unique Female=27, Unique Male=11). The response variable was assumed to be binomial, given random effect for female and male identity. After a successive exclusion of the least significant terms ( $p \geq 0.05$ ), the significance values of the final model are shown in the table. Non-significant terms are presented with the values they were removed from the model. Male and female id were treated as random effects.

b. df is degrees of freedom, B is the logistic regression coefficient, s.e. is the standard error, t denotes the t-value and p the significance level.

\*denotes significant factors in final model with highest BIC

**Supplementary Table 2. Summary of generalized linear mixed model of cub production for female giant pandas<sup>a</sup> using step-wise .**

| Explanatory variables    | B <sup>b</sup> | s.e. <sup>b</sup> | Wald Chi-Square <sup>b</sup> | d.f. <sup>b</sup> | p <sup>b</sup> |
|--------------------------|----------------|-------------------|------------------------------|-------------------|----------------|
| Fixed effects            |                |                   |                              |                   |                |
| Intercept                | 22.30          | 4.35              | 26.34                        | 1                 | <0.001         |
| Preference               | 4.91           | 1.46              | 11.35                        | 1                 | 0.001*         |
| Neighbor Status (days)   | 0.24           | 0.23              | 1.10                         | 1                 | 0.294          |
| Pair had cubs previously | 2.197          | 0.94              | -3.49                        | 1                 | 0.020          |
| Provenance               | -1.92          | 3.39              | 0.32                         | 1                 | 0.572          |
| Rearing                  | -3.74          | 1.60              | 5.48                         | 1                 | 0.019*         |
| Female age (years)       | -0.33          | 0.21              | 2.45                         | 1                 | 0.118          |
| Female mass (kg)         | 0.04           | 0.08              | 0.33                         | 1                 | 0.568          |
| Male age (years)         | -0.46          | 0.18              | 6.93                         | 1                 | 0.008*         |
| Male mass (kg)           | -0.17          | 0.05              | 12.28                        | 1                 | <0.001*        |
| BIC                      |                |                   |                              |                   | 31.48          |

a. As a function of preference, neighbor status, if the pair had successfully had cubs previously, provenance, rearing, female mass and age, male mass and age, (N=41, Unique Female=27, Unique Male=11). The response variable was assumed to be binomial, given random effect for female and male identity. After a successive exclusion of the least significant terms ( $p \geq 0.05$ ), the significance values of the final model are shown in the table. Non-significant terms are presented with the values they were removed from the model. Male and female id were treated as random effects.

b. d.f. is degrees of freedom, B is the logistic regression coefficient, s.e. is the standard error, t denotes the t-value and p the significance level.

\*denotes significant factors in final model with highest BIC

**Supplementary Table 3. Summary of a generalized linear mixed model of intromission for male giant pandas<sup>a</sup>.**

| Explanatory variables    | B <sup>b</sup> | s.e. <sup>b</sup> | Wald Chi-Square <sup>b</sup> | d.f. <sup>b</sup> | p <sup>b</sup> |
|--------------------------|----------------|-------------------|------------------------------|-------------------|----------------|
| Fixed effects            |                |                   |                              |                   |                |
| Intercept                | -2.52          | 0.87              | 8.43                         | 1                 | 0.004          |
| Preference               | 1.44           | 0.87              | 2.70                         | 1                 | 0.100*         |
| Neighbor Status (days)   | -0.04          | 0.10              | 0.14                         | 1                 | 0.712          |
| Pair had cubs previously | 2.01           | 1.10              | 3.32                         | 1                 | 0.069*         |
| Provenance               | -0.88          | 2.18              | 0.16                         | 1                 | 0.687          |
| Female age (years)       | 0.60           | 0.14              | 0.17                         | 1                 | 0.677          |
| Female mass (kg)         | 0.05           | 0.04              | 1.47                         | 1                 | 0.225          |
| Male age (years)         | -0.17          | 0.22              | 0.59                         | 1                 | 0.441          |
| Male mass (kg)           | -0.10          | 0.74              | 1.74                         | 1                 | 0.187          |
| BIC                      |                |                   |                              |                   | 49.73          |

a. As a function of preference, neighbor status, if the pair had successfully had cubs previously, provenance, rearing, female mass and age, male mass and age, (N=41, Unique Female=27, Unique Male=11). The response variable was assumed to be binomial, given random effect for female and male identity. After a successive exclusion of the least significant terms ( $p \geq 0.05$ ), the significance values of the final model are shown in the table. Non-significant terms are presented with the values they were removed from the model. Male and female id were treated as random effects.

b. d.f. is degrees of freedom, B is the logistic regression coefficient, s.e. is the standard error, t denotes the t-value and p the significance level.

\*denotes significant factors in final model with highest BIC

**Supplementary Table 4. Summary of a generalized linear mixed model of cub production for male giant pandas<sup>a</sup>.**

| Explanatory variables    | B <sup>b</sup> | s.e. <sup>b</sup> | Wald Chi-Square <sup>b</sup> | d.f. <sup>b</sup> | p <sup>b</sup> |
|--------------------------|----------------|-------------------|------------------------------|-------------------|----------------|
| Fixed effects            |                |                   |                              |                   |                |
| Intercept                | 23.88          | 9.90              | 5.82                         | 1                 | 0.016          |
| Preference               | 1.64           | 1.08              | 2.32                         | 1                 | 0.128*         |
| Neighbor Status (days)   | 0.01           | 0.19              | 0.002                        | 1                 | 0.964          |
| Pair had cubs previously | 0.17           | 1.01              | 0.03                         | 1                 | 0.867          |
| Provenance               | -3.532         | 1.11              | 10.15                        | 1                 | 0.001          |
| Female age (years)       | 0.02           | 0.09              | 0.03                         | 1                 | 0.870          |
| Female mass (kg)         | 0.05           | 0.03              | 2.73                         | 1                 | 0.980          |
| Male age (years)         | -0.58          | 0.16              | 0.14                         | 1                 | 0.712          |
| Male mass (kg)           | -0.20          | 0.08              | 5.90                         | 1                 | 0.015*         |
| BIC                      |                |                   |                              |                   | 42.01          |

a. As a function of preference, neighbor status, if the pair had successfully had cubs previously, provenance, rearing, female mass and age, male mass and age, (N=41, Unique Female=27, Unique Male=11). The response variable was assumed to be binomial, given random effect for female and male identity. After a successive exclusion of the least significant terms ( $p \geq 0.05$ ), the significance values of the final model are shown in the table. Non-significant terms are presented with the values they were removed from the model. Male and female id were treated as random effects.

b. d.f. is degrees of freedom, B is the logistic regression coefficient, s.e. is the standard error, t denotes the t-value and p the significance level.

\*denotes significant factors in final model with highest BIC
